# Supplementary material for: CD8+ T Cell Phenotype and Function in Childhood and Adult-Onset Connective Tissue Disease
Source: MDPI journal article supplement (doi:10.3390/ijms231911431), 2022-09-28
Supplement: s1 [file s1]

**Table S1.** Altered peripheral blood CD8<sup>+</sup> T cell phenotype in adults with SLE.

| Author et al.,<br>year [ref]         | Type of<br>study                                               | N: patients or<br>controls<br>Age <sup>1</sup> : Mean $\pm$ SD or<br>median (range) or<br>[IQR]                        | CD8 <sup>+</sup> T cell populations                                                                                                                                                                                                                                                                                                                                                                   | Clinical relevance                                                                                                                                                                                                                                                                                                                                                                                                                                                                                                            |
|--------------------------------------|----------------------------------------------------------------|------------------------------------------------------------------------------------------------------------------------|-------------------------------------------------------------------------------------------------------------------------------------------------------------------------------------------------------------------------------------------------------------------------------------------------------------------------------------------------------------------------------------------------------|-------------------------------------------------------------------------------------------------------------------------------------------------------------------------------------------------------------------------------------------------------------------------------------------------------------------------------------------------------------------------------------------------------------------------------------------------------------------------------------------------------------------------------|
| Wiechmann<br>A. et al., 2021<br>[72] | Cross-<br>sectional                                            | N= 31 SLE<br>42.5 $\pm$ 13.7<br>N=21 HC<br>38.2 $\pm$ 14.4                                                             | Decreased % CD8 <sup>+</sup> CD107a <sup>+</sup> T cells in SLE vs<br>HC ( $p = 0.02$ ).                                                                                                                                                                                                                                                                                                              | Decreased % CD8 <sup>+</sup> CD107a <sup>+</sup> T cells associated<br>with absence of LN ( $p = 0.01$ ), inactive disease<br>( $p = 0.003$ ) and HCQ treatment in combination<br>with either prednisolone ( $p = 0.02$ ) or<br>prednisolone and other DMARDs ( $p = 0.004$ ).<br>Positive correlation between % CD8 <sup>+</sup> CD107a <sup>+</sup> T<br>cells and SLEDAI ( $r = 0.5$ , $p < 0.005$ ). Negative<br>correlation between % CD8 <sup>+</sup> CD107a <sup>+</sup> and HCQ<br>dose ( $r = -0.5$ , $p = 0.005$ ). |
| Lima G. et al.,<br>2021 [49]         | Cross-<br>sectional                                            | N=30 SLE<br>15 active + 15<br>inactive<br>33 (30–46) active SLE<br>49 (48–60) inactive<br>SLE<br>N=29 HC<br>43 (32–52) | No difference in % CD3 <sup>+</sup> CD8 <sup>+</sup> T cells in SLE<br>(regardless of disease activity) vs HC.<br>No difference in % CD8 <sup>+</sup> TEMRA population<br>between HC and SLE.<br>Increased cell activation (CD38 <sup>+</sup> HLA-DR <sup>+</sup> , $p < 0.01$ ) and exhaustion (CD38 <sup>+</sup> HLA-DR <sup>+</sup> PD-1 <sup>+</sup> , $p < 0.001$ ) T cell markers in SLE vs HC. | Reduced % naïve CD8 <sup>+</sup> T cells in inactive SLE<br>vs active SLE ( $p < 0.05$ ).<br>Increased % CM CD8 <sup>+</sup> T cells in inactive SLE<br>vs HC and active SLE ( $p < 0.01$ ).<br>Reduced % EM CD8 <sup>+</sup> T cells in active SLE vs<br>HC and inactive SLE ( $p < 0.05$ ).                                                                                                                                                                                                                                 |
| Lu Z. et al.,<br>2019 [53]           | Cross-<br>sectional                                            | N=39 SLE<br>36.4 $\pm$ 13.5<br>N=25 HC<br>ASM                                                                          | Increased % of CD8 <sup>+</sup> T cells in SLE compared<br>to HC ( $p = 0.029$ ). Decreased absolute CD8 <sup>+</sup> T<br>cell counts ( $p < 0.01$ ) and CD4/CD8 T cell ratios<br>( $p = 0.001$ ) in SLE vs HC.                                                                                                                                                                                      | All patients were treatment naïve.                                                                                                                                                                                                                                                                                                                                                                                                                                                                                            |
| Minning S. et<br>al. 2019 [69]       | Cross-<br>sectional<br>with 28-day<br>follow-up<br>for limited | N=47 SLE<br>Mean Age: 32.7 (19–<br>68)<br>N=20 HC<br>Mean age: 37                                                      | Decreased % CD8 <sup>+</sup> CD28 <sup>+</sup> T cells and<br>CD8 <sup>+</sup> CD28 <sup>-</sup> /CD8 <sup>+</sup> CD28 <sup>+</sup> T cell ratio in high-<br>activity SLE vs HC and inactive SLE ( $p < 0.05$ ).<br>Increased % CD8 <sup>+</sup> CD28 <sup>-</sup> T cells in inactive SLE<br>patients vs HC ( $p < 0.05$ ).                                                                         | Inverse correlation between % CD8 <sup>+</sup> CD28 <sup>+</sup> T<br>cells and SLEDAI ( $r = -0.5$ , $p < 0.01$ ). Positive<br>correlation between CD8 <sup>+</sup> CD28 <sup>-</sup> /CD8 <sup>+</sup> CD28 <sup>+</sup><br>ratio and SLEDAI ( $r = 0.45$ , $p < 0.01$ ). Decreased<br>% CD8 <sup>+</sup> CD28 <sup>+</sup> in SLE patients with a reduced<br>C3 level ( $p < 0.05$ ). CD8 <sup>+</sup> CD28 <sup>-</sup> /CD8 <sup>+</sup> CD28 <sup>+</sup>                                                               |

|                                       | subset of patients |                                                               |                                                                                                                                                                                                                                                                                                                                                                                                                                                                                                    | ratio higher in patients with a reduced vs normal C3 levels and higher in patients with vs without kidney damage ( $p < 0.05$ ). % CD8 <sup>+</sup> CD28 <sup>+</sup> and CD8 <sup>+</sup> CD28 <sup>-</sup> /CD8 <sup>+</sup> CD28 <sup>+</sup> ratio normalised 28 days post high dose steroids $\pm$ immunosuppressants. |
|---------------------------------------|--------------------|---------------------------------------------------------------|----------------------------------------------------------------------------------------------------------------------------------------------------------------------------------------------------------------------------------------------------------------------------------------------------------------------------------------------------------------------------------------------------------------------------------------------------------------------------------------------------|-----------------------------------------------------------------------------------------------------------------------------------------------------------------------------------------------------------------------------------------------------------------------------------------------------------------------------|
| Gao H. et al., 2018 [59]              | Cross-sectional    | N= 40 SLE<br>29.41 $\pm$ 6.28<br>N= 40 HC<br>29.70 $\pm$ 5.99 | Increased % CD8 <sup>+</sup> T cells in SLE vs HC ( $p < 0.001$ ).                                                                                                                                                                                                                                                                                                                                                                                                                                 | Positive correlation between % CD8 <sup>+</sup> T cells and RF level ( $r = 0.50$ , $p = 0.002$ ). Negative correlation between % CD8 <sup>+</sup> cells and C3 ( $r = -0.374$ , $p = 0.017$ ) and C4 ( $r = -0.509$ , $p = 0.001$ ).                                                                                       |
| Manjarres-Orduno N. et al., 2017 [63] | Cross-sectional    | N=44 SLE<br>38.5 $\pm$ 10.41<br>N=40 HC<br>39.3 $\pm$ 9.42    | No difference in naïve (CD45RA <sup>+</sup> CCR7 <sup>+</sup> ), CM (CD45RA <sup>-</sup> , CCR7 <sup>+</sup> ) or early memory (CCR7 <sup>-</sup> CD28 <sup>+</sup> ) subsets, between HC and SLE. Increased % TEMRA (CCR7 <sup>-</sup> CD45RA <sup>+</sup> CD28 <sup>-</sup> ) cells in SLE vs HC ( $p = 0.02$ ). Patients with increased % of these cells had a “cytotoxic phenotype” (higher production of IFN- $\gamma$ , perforin, & granzyme B) across all stages of T cell differentiation. | Increased % of terminally differentiated CD8 <sup>+</sup> T cells associated with LN ( $p < 0.02$ ).                                                                                                                                                                                                                        |
| Mortezagholi S. et al., 2016 [54]     | Cross-sectional    | N=35 SLE<br>37.17 $\pm$ 11.04<br>N=38 HC<br>ASM               | Increased % of CD8 <sup>+</sup> T cells in SLE vs HC ( $p < 0.001$ ).<br>Decreased CD4/CD8 ratio in SLE vs HC ( $p = 0.009$ ).<br>Increased TLR9 expression on CD8 <sup>+</sup> T cells in SLE vs HC ( $p = 0.001$ ).                                                                                                                                                                                                                                                                              | None reported.                                                                                                                                                                                                                                                                                                              |
| Kim J-S. et al., 2012 [71]            | Cross-sectional    | N=21 SLE<br>35.8 $\pm$ 9.3<br>N=23 HC<br>33.3 $\pm$ 7.0       | Increased % of cytotoxic IL7R $\alpha^{\text{low}}$ cells in SLE ( $p = 0.027$ ).                                                                                                                                                                                                                                                                                                                                                                                                                  | Positive correlation between % of IL7R $\alpha^{\text{low}}$ EM CD8 <sup>+</sup> cells and SLEDAI score ( $r = 0.483$ , $p = 0.026$ ).                                                                                                                                                                                      |
| Suarez-Fueyo A. et al., 2011 [55]     | Cross-sectional    | N=55 SLE<br>Age range: 25–58<br>N=31 HC<br>Age range: 24–55   | Increased % CD8 <sup>+</sup> T cells in SLE vs HC ( $p < 0.01$ ). Increased % memory CD8 <sup>+</sup> CD45RO <sup>+</sup> cells in inactive ( $p < 0.01$ ) and active SLE ( $p < 0.001$ ) vs HC.                                                                                                                                                                                                                                                                                                   | None reported.                                                                                                                                                                                                                                                                                                              |

|                                 |                          |                                                                                                                                              |                                                                                                                                                                                                                                                                                                            |                                                                                                                                                                                                                                                                                                                                                                                                                                                                                                    |
|---------------------------------|--------------------------|----------------------------------------------------------------------------------------------------------------------------------------------|------------------------------------------------------------------------------------------------------------------------------------------------------------------------------------------------------------------------------------------------------------------------------------------------------------|----------------------------------------------------------------------------------------------------------------------------------------------------------------------------------------------------------------------------------------------------------------------------------------------------------------------------------------------------------------------------------------------------------------------------------------------------------------------------------------------------|
| Shah D. et al., 2011 [70]       | Cross-sectional          | N=26 SLE<br>28.5 ± 7.50<br>N=26 HC<br>26.90 ± 8.0                                                                                            | Increased % CD8 <sup>+</sup> granzyme B <sup>+</sup> T cells ( $p < 0.001$ ), % CD8 <sup>+</sup> perforin <sup>+</sup> T cells ( $p < 0.001$ ) and % CD8 <sup>+</sup> T cells co-expressing granzyme B and perforin ( $p < 0.001$ ) in SLE vs HC. Increased serum granzyme B in SLE vs HC ( $p < 0.001$ ). | Positive correlation between SLEDAI score and % perforin <sup>+</sup> CD8 <sup>+</sup> ( $r = 0.543, p < 0.01$ ), % granzyme B <sup>+</sup> CD8 <sup>+</sup> ( $r = 0.508, p < 0.01$ ), % perforin <sup>+</sup> granzyme B <sup>+</sup> CD8 <sup>+</sup> cells ( $r = 0.705, p < 0.001$ ). Negative correlation between serum granzyme B and C3 ( $r = -0.510, p < 0.01$ ) and C4 ( $r = -0.583, p < 0.01$ ). Positive correlation between serum granzyme B and SLEDAI ( $r = 0.783, p < 0.001$ ). |
| Shah D. et al., 2011 [58]       | Cross-sectional          | N=35 SLE<br>28.5 ± 7.80<br>N=35 HC<br>28.25 ± 6.80                                                                                           | Increased % CD8 <sup>+</sup> T cells in SLE vs HC ( $p < 0.001$ ). Decreased CD4 <sup>+</sup> /CD8 <sup>+</sup> T cell ratio in SLE vs HC ( $p < 0.001$ ).                                                                                                                                                 | None reported.                                                                                                                                                                                                                                                                                                                                                                                                                                                                                     |
| Dolff S. et al., 2010 [62]      | Cross-sectional          | N=43 SLE<br>41±12<br>N=20 HC<br>36±10                                                                                                        | Increased % CD8 <sup>+</sup> CM (CCR7 <sup>+</sup> CD45RO <sup>+</sup> ) in SLE vs HC ( $p = 0.02$ ).<br>Decreased % CD8 <sup>+</sup> EM in SLE vs HC ( $p = 0.008$ ).<br>No difference in % naïve CD8 <sup>+</sup> T cells.                                                                               | Increased % CD8 <sup>+</sup> CM in active disease vs HC ( $p = 0.009$ ) and SLE without active LN ( $p = 0.02$ ).<br>Decreased % CD8 EM in active SLE vs HC ( $p = 0.004$ ), reduced in those without active LN ( $p = 0.03$ ) and lowest in those with active LN ( $p = 0.01$ ).                                                                                                                                                                                                                  |
| McKinney E.F. et al., 2010 [64] | Longitudinal prospective | N=29 SLE (7 poor prognosis, 18 better prognosis)<br>Mean age (SEM) poor prognosis: 42.6 (4.3)<br>Mean age (SEM) better prognosis: 43.3 (3.2) | Increased % CD3 <sup>+</sup> CD8 <sup>+</sup> CD45RA <sup>-</sup> ( $p = 0.039$ ) and absolute count ( $p = 0.003$ ) of memory cells (both EM and CM) in SLE with poor prognosis.                                                                                                                          | Increased % and number of CD8 <sup>+</sup> memory cells is associated with lower flare-free survival time in SLE.                                                                                                                                                                                                                                                                                                                                                                                  |
| Bohm I. 2006 [60]               | Cross-sectional          | N= 124 LE (SLE+ cutaneous LE)<br>Mean age: 43.7 (8–84)<br>N=57 HC                                                                            | Decreased absolute CD3 <sup>+</sup> CD8 <sup>+</sup> T cell count in LE compared to HC ( $p < 4 \times 10^{-11}$ ).                                                                                                                                                                                        | None reported.                                                                                                                                                                                                                                                                                                                                                                                                                                                                                     |

|                                  |                          |                                                                                                                   |                                                                                                                                                                                                                                                                            |                                                                                                                                                                                                                                                                                    |
|----------------------------------|--------------------------|-------------------------------------------------------------------------------------------------------------------|----------------------------------------------------------------------------------------------------------------------------------------------------------------------------------------------------------------------------------------------------------------------------|------------------------------------------------------------------------------------------------------------------------------------------------------------------------------------------------------------------------------------------------------------------------------------|
|                                  |                          | Mean Age: 40.8 (11–84)                                                                                            |                                                                                                                                                                                                                                                                            |                                                                                                                                                                                                                                                                                    |
| Wang H. et al., 2005 [51]        | Cross-sectional          | N=49 SLE<br>Mean age: 25.3<br>N=30 HC<br>AM                                                                       | No differences in % of CD8 <sup>+</sup> T cells SLE vs HC. Decreased CD4/CD8 T cell ratio in SLE (both active and inactive) vs HC ( $p < 0.05$ ).                                                                                                                          | No difference in % CD8 <sup>+</sup> cells between active and inactive SLE.                                                                                                                                                                                                         |
| Wouters C.H.P. et al., 2004 [52] | Cross-sectional          | N=25 SLE<br>34.5 (17.4–56.5)<br>N=38 HC                                                                           | No difference in % CD8 <sup>+</sup> T cells between SLE vs HC.<br>Decreased absolute CD8 <sup>+</sup> T cell counts in SLE vs HC ( $p < 0.01$ ).<br>Increased % of activated CD8 <sup>+</sup> T cells (CD8 <sup>+</sup> HLA-DR <sup>+</sup> ) in SLE vs HC ( $p < 0.05$ ). | SLE patients were not on corticosteroids or immunosuppressive therapy. Distribution of lymphocyte subsets remained the same between HCQ treated and untreated groups.                                                                                                              |
| Sen Y. et al., 2004 [124]        | Cross-sectional          | N= 37 SLE<br>31.4 (21–48)<br>N= 18 HC<br>30.5 (18–48)                                                             | Increased % CD8 <sup>+</sup> CCR7 <sup>+</sup> T cells in active SLE vs inactive SLE and HC ( $p < 0.01$ ). These are mostly CM cells (CD45RO <sup>+</sup> expression over 90% in all groups).                                                                             | Increased % of CM CD8 <sup>+</sup> cells seen in active lupus only.                                                                                                                                                                                                                |
| Viallard J.F. et al., 2001 [67]  | Longitudinal prospective | N=34 SLE with quiescent disease, Mean age: 37.9 (16–74)<br>N=26 SLE with active disease<br>Mean Age: 38.0 (16–79) | Increased % CD8 <sup>+</sup> HLA-DR <sup>+</sup> T cells in active vs inactive SLE ( $p = 0.0000001$ ). No difference in absolute counts.                                                                                                                                  | No differences in % CD8 <sup>+</sup> HLA-DR <sup>+</sup> T cells between group receiving treatment and untreated patients. In multivariate analysis, % CD8 <sup>+</sup> HLA-DR <sup>+</sup> was found to be the best biological parameter associated with flaring ( $p < 0.001$ ). |
| Hu S. et al., 2001 [57]          | Cross-sectional          | N=21 active SLE<br>29.14 ± 7.82<br>N=10 HC<br>32.07 ± 8.73                                                        | Increased % of CD8 <sup>+</sup> T cells in SLE vs HC ( $p < 0.01$ ). Decreased CD4/CD8 T cell ratio in SLE vs HC ( $p < 0.01$ ).                                                                                                                                           | None reported.                                                                                                                                                                                                                                                                     |

<sup>1</sup>Age in years expressed in this format, unless specified otherwise.

Abbreviations used: AM = age matched, ASM = age and sex matched, CM = central memory, C3 = complement 3, C4 = complement 4, DMARDs = disease-modifying antirheumatic drugs, EM = effector memory, HC = healthy controls, HLA-DR = Human Leukocyte Antigen-DR, HCQ = hydroxychloroquine, IFN = interferon, IL7R = interleukin-7-receptor IQR = interquartile range, LE = lupus erythematosus, LN = lupus nephritis, PD-1 = programmed cell death protein 1, RF = rheumatoid factor, SD =

standard deviation, SEM = standard error of the mean, SLE = systemic lupus erythematosus, SLEDAI = Systemic Lupus Erythematosus Disease Activity Index, TEMRA = Terminally differentiated effector memory cells, TLR = Toll-like receptor.

**Table S2.** Altered peripheral blood CD8<sup>+</sup> T cell phenotype in adults with connective tissue disease.

| Author et al.,<br>year [ref]      | Type of<br>study    | N: patients or<br>controls<br>Age <sup>1</sup> : Mean $\pm$ SD<br>or median<br>(range) or [IQR] | Altered CD8 <sup>+</sup> T cell phenotype                                                                                                                                                                                                                                 | Clinical relevance                                                                                                                                                                                                                                                                                                                                                                                                                                                                                                                                                                                                                                                                                                                                                                                                                                                                                                                                                                                                                                                                                                                                                                                                                                                                                                                                                                                  |
|-----------------------------------|---------------------|-------------------------------------------------------------------------------------------------|---------------------------------------------------------------------------------------------------------------------------------------------------------------------------------------------------------------------------------------------------------------------------|-----------------------------------------------------------------------------------------------------------------------------------------------------------------------------------------------------------------------------------------------------------------------------------------------------------------------------------------------------------------------------------------------------------------------------------------------------------------------------------------------------------------------------------------------------------------------------------------------------------------------------------------------------------------------------------------------------------------------------------------------------------------------------------------------------------------------------------------------------------------------------------------------------------------------------------------------------------------------------------------------------------------------------------------------------------------------------------------------------------------------------------------------------------------------------------------------------------------------------------------------------------------------------------------------------------------------------------------------------------------------------------------------------|
| <b>Sjogren's syndrome (SS)</b>    |                     |                                                                                                 |                                                                                                                                                                                                                                                                           |                                                                                                                                                                                                                                                                                                                                                                                                                                                                                                                                                                                                                                                                                                                                                                                                                                                                                                                                                                                                                                                                                                                                                                                                                                                                                                                                                                                                     |
| Wu C. et al.,<br>2018 [80]        | Cross-<br>sectional | N=32 pSS<br>54 (43.75–64)<br>N=23 SLE<br>34 (18–74)<br>N= 20 HC<br>42 (33.75–46.25)             | Increased % CCR7 <sup>+</sup> CD8 <sup>+</sup> cells in pSS and<br>SLE vs HC ( $p < 0.05$ ) Higher<br>chemotactic motility of CD8 <sup>+</sup> cells T cells<br>in pSS and SLE vs HC ( $p < 0.05$ ).                                                                      | None reported.                                                                                                                                                                                                                                                                                                                                                                                                                                                                                                                                                                                                                                                                                                                                                                                                                                                                                                                                                                                                                                                                                                                                                                                                                                                                                                                                                                                      |
| Sudzius G. et al.,<br>(2015) [75] | Cross-<br>sectional | N=52 pSS (n=29<br>pSS Ab-ve, n=23<br>pSS Ab+ve)<br>57 $\pm$ 13<br>N=28 HC<br>53 $\pm$ 11        | No difference in % CD8 <sup>+</sup> T cells in pSS vs<br>HC. Decreased absolute CD8 <sup>+</sup> T cell count in<br>pSS vs HC ( $p < 0.01$ ). Decreased absolute<br>count of CD8 <sup>+</sup> CD57 <sup>+</sup> CD27 <sup>+</sup> T cells ( $p < 0.01$ )<br>in pSS vs HC. | Positive correlation between focus score and absolute<br>counts of CD8 <sup>+</sup> CD57 <sup>+</sup> CD27 <sup>+</sup> T cells ( $r = 0.560$ , $p = 0.016$ )<br>in SS Ab-ve patients.<br>In SS Ab+ve patients: Positive correlation between<br>Schirmer's I test and % CD8 <sup>+</sup> CD57 <sup>+</sup> CD27 <sup>+</sup> T cells ( $r =$<br>0.589, $p = 0.006$ ) and negative correlation with %<br>CD8 <sup>+</sup> CD57 <sup>+</sup> CD27 <sup>+</sup> T cells ( $r = -0.479$ , $p = 0.033$ ).<br>Positive correlation between Schirmer's I test and<br>CD8 <sup>+</sup> CD57 <sup>+</sup> CD27 <sup>+</sup> absolute T cell count ( $r = 0.512$ , $p =$<br>0.021) and negative correlation with CD8 <sup>+</sup> CD57 <sup>+</sup> CD27 <sup>+</sup><br>T cell count ( $r = -0.525$ , $p = 0.017$ ). Positive correlation<br>between unstimulated salivary flow rate and %<br>CD8 <sup>+</sup> T cell ( $r = 0.525$ , $p = 0.017$ ). Negative correlation<br>between focus score and % and absolute counts of<br>CD8 <sup>+</sup> CD57 <sup>+</sup> CD27 <sup>+</sup> T cells, respectively, ( $r = -0.517$ , $p =$<br>0.02) and ( $r = -0.462$ , $p = 0.04$ ). Negative correlation<br>between ESSDAI and absolute counts of CD8 <sup>+</sup> T cells<br>( $r = -0.459$ , $p = 0.042$ ) and CD8 <sup>+</sup> CD57 <sup>+</sup> CD27 <sup>+</sup> ( $r = -0.492$ ,<br>$p = 0.028$ ) T cells. |

|                                                 |                 |                                                                                                                   |                                                                                                                                                                                                                                                                                                                                     |                                                                                                                                                                                                                                                                                                                           |
|-------------------------------------------------|-----------------|-------------------------------------------------------------------------------------------------------------------|-------------------------------------------------------------------------------------------------------------------------------------------------------------------------------------------------------------------------------------------------------------------------------------------------------------------------------------|---------------------------------------------------------------------------------------------------------------------------------------------------------------------------------------------------------------------------------------------------------------------------------------------------------------------------|
| Fauchais A. et al., 2009 [77]                   | Cross-sectional | N= 18 SS<br>57 (21–83)<br>N= 12 HC, ASM                                                                           | Increased activated HLA-DR <sup>+</sup> CD8 <sup>+</sup> T cell absolute cell count in pSS vs HC ( $p = 0.02$ ).                                                                                                                                                                                                                    | None reported.                                                                                                                                                                                                                                                                                                            |
| <b>Systemic sclerosis (SSc)</b>                 |                 |                                                                                                                   |                                                                                                                                                                                                                                                                                                                                     |                                                                                                                                                                                                                                                                                                                           |
| Gambichler T. et al., 2010 [84]                 | Cross-sectional | N=29 SSc (22 lcSSc, 7 dcSSc)<br>56.3 ± 12.9<br>N=29 HC<br>51.1 ± 13.4                                             | No difference in % CD8 <sup>+</sup> T cells in SSc vs HC. Decreased absolute CD8 <sup>+</sup> T cell count in SSc vs HC ( $p = 0.021$ ).                                                                                                                                                                                            | None reported.                                                                                                                                                                                                                                                                                                            |
| Hussein M. et al., 2005 [83]                    | Cross-sectional | N= 19 SSc<br>34.8±2.6<br>N=6 HC<br>33.03 ± 7.2                                                                    | No difference in CD8 <sup>+</sup> cell count in SSc vs HC. Increased CD4 <sup>+</sup> /CD8 <sup>+</sup> ratio in SSc vs HC ( $p < 0.01$ ).                                                                                                                                                                                          | None reported.                                                                                                                                                                                                                                                                                                            |
| Tiev K. et al., 2004 [82]                       | Cross-sectional | N= 11 dcSSc<br>Mean age: 48<br>SEM ±4<br>N=11 lcSSc<br>Mean age: 54<br>SEM ±2<br>N=11 HC<br>Mean age: 52<br>SEM±2 | No difference in % activated HLA-DR <sup>+</sup> CD8 <sup>+</sup> or CD25 <sup>+</sup> CD8 <sup>+</sup> T cells in SSc vs HC. Decreased % CD8 <sup>+</sup> in dcSSc vs HC ( $P < 0.05$ ). No difference in % CD8 <sup>+</sup> T cells in lcSSc vs HC. No significant CD8 <sup>+</sup> T cell repertoire perturbations in SSc vs HC. | None reported.                                                                                                                                                                                                                                                                                                            |
| Tsuji-Yamada J. et al., 2001 [81]               | Cross-sectional | N = 23 SSc (12 lcSSc, 11 dcSSc)<br>58 ± 8.9<br>N= 14 HC<br>52.2 ± 3.6                                             | Increased % CD8 <sup>+</sup> T cells in SSc vs HC ( $p < 0.05$ ). Increased % CD8 <sup>+</sup> IL-4 <sup>+</sup> T cells ( $p < 0.05$ ) in SSc vs HC. Decreased % CD8 <sup>+</sup> IL-2 <sup>+</sup> T cells in SSc vs HC ( $p < 0.001$ ).                                                                                          | No difference in % CD8 <sup>+</sup> T cells with age, treatment, ANA type, extent of skin sclerosis, presence of pulmonary fibrosis, or oesophageal dysfunction. Negative correlation between IL-4/IL-4 <sup>+</sup> IL-2 <sup>+</sup> producing CD8 <sup>+</sup> T cells and SSc duration ( $r = -0.526$ , $p = 0.01$ ). |
| <b>Polymyositis and Dermatomyositis (PM/DM)</b> |                 |                                                                                                                   |                                                                                                                                                                                                                                                                                                                                     |                                                                                                                                                                                                                                                                                                                           |
| Wilkinson M. et al., 2020 [90]                  | Cross-sectional | N=19 DM<br>55.8 [46.21–60.3]<br>N=9 PM<br>52.37<br>[48.35–53.10]                                                  | Decreased % CD8 <sup>+</sup> CM T cells in PM vs HC ( $p = 0.0093$ ). No difference in %CD8 <sup>+</sup> T cells in DM/PM vs HC.                                                                                                                                                                                                    | No association with treatment or disease activity. Decreased % CD8 <sup>+</sup> CM in patients with anti-Ro, anti-PM/Scl and anti-RNP antibodies.                                                                                                                                                                         |

|                                 |                 |                                                                       |                                                                                                                                    |                |
|---------------------------------|-----------------|-----------------------------------------------------------------------|------------------------------------------------------------------------------------------------------------------------------------|----------------|
|                                 |                 | N=25 HC<br>51.26<br>[43.23-58.31]                                     |                                                                                                                                    |                |
| Benveniste O. et al., 2001 [91] | Cross-sectional | N= 10 PM<br>58.8 ± 16.3<br>N= 10 DM<br>49.7 ± 20.4<br>N=17 HC<br>32±9 | Perturbations in CD8 <sup>+</sup> T cell repertoire in PM vs DM and PM vs HC due to oligoclonal CD8 <sup>+</sup> T cell expansion. | None reported. |

<sup>1</sup>Age in years expressed in this format, unless specified otherwise.

Abbreviations used: Ab = antibody, ANA = antinuclear antibody, ASM = age and sex matched, CM = central memory, CCR = CC-chemokine receptor, DM = dermatomyositis, dcSSc = diffuse cutaneous systemic sclerosis, ESSDAI = EULAR Sjögren's syndrome disease activity index, , HC = healthy controls, HLA-DR = Human Leukocyte Antigen-DR, IQR = interquartile range, IL= Interleukin, , lcSSc = limited cutaneous systemic sclerosis, PM = polymyositis, pSS = primary Sjögren's syndrome, RNP = ribonucleoprotein, SD = standard deviation, SEM = standard error of the mean, SLE = systemic lupus erythematosus, SS = Sjögren's syndrome, SSc = systemic sclerosis.
